# Supplementary material for: Synthesis, characterization and in vitro validation of a magnetic zeolite nanocomposite with T2-MRI properties towards theranostic applications
Source: Royal Society of Chemistry journal article supplement (doi:10.1039/c9tb00078j), 2019-01-01
Supplement: c9tb00078j1.pdf [file c9tb00078j1.pdf]

## Electronic Supplementary Information

### **Synthesis, characterization and *in vitro* validation of a magnetic zeolite nanocomposite with $T_2$ -MRI properties towards theranostic applications**

Natália Vilaça,<sup>[a]</sup> Juan Gallo,<sup>[b]</sup> Rui Fernandes,<sup>[c]</sup> Francisco Figueiredo,<sup>[c]</sup> António M. Fonseca<sup>[a,d]</sup>, Fátima Baltazar,<sup>[e,f]</sup> Isabel C. Neves<sup>\*[a,d]</sup> and Manuel Bañobre-López<sup>\*[b]</sup>

<sup>a</sup>*Centre of Chemistry, Chemistry Department, University of Minho, Campus de Gualtar, 4710-057 Braga, Portugal - \*E-mail: ([ineves@quimica.uminho.pt](mailto:ineves@quimica.uminho.pt))*

<sup>b</sup>*INL – Advanced (magnetic) Theranostic Nanostructures Lab, Life Sciences Department, International Iberian Nanotechnology Laboratory, Avenida Mestre José Veiga, Braga, Portugal – \*E-mail: ([manuel.banobre@inl.int](mailto:manuel.banobre@inl.int))*

<sup>c</sup>*i3S - Instituto de Investigação e Inovação em Saúde and HEMS / IBMC - Histology and Electron Microscopy Service, Universidade do Porto, 4200-135 Porto, Portugal*

<sup>d</sup>*CEB - Centre of Biological Engineering, University of Minho, 4710-057 Braga, Portugal.*

<sup>e</sup>*Life and Health Sciences Research Institute (ICVS), School of Medicine, University of Minho, Campus de Gualtar, Braga, Portugal*

<sup>f</sup>*ICVS/3B's - PT Government Associate Laboratory, Braga/Guimarães, Portugal*

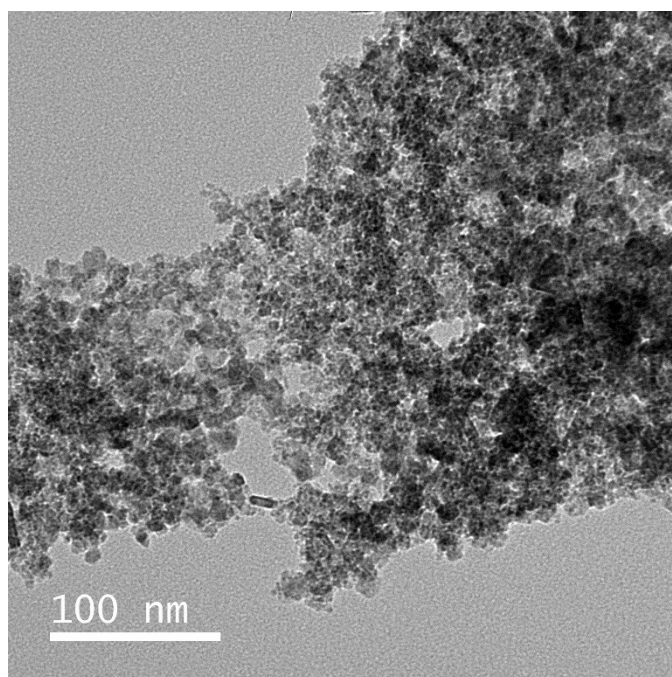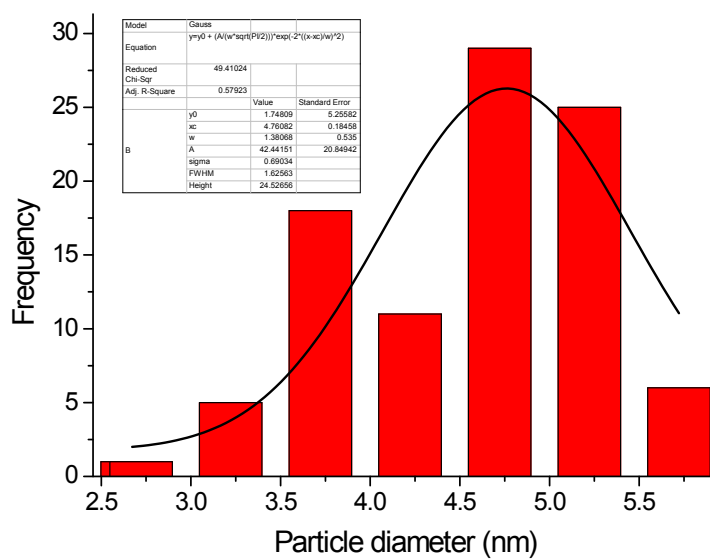

Figure S1: (Upper) TEM micrograph of the as-synthesized magnetite nanoparticles; (lower) Particle size distribution obtained from the TEM picture above and fitted to a Gaussian function.

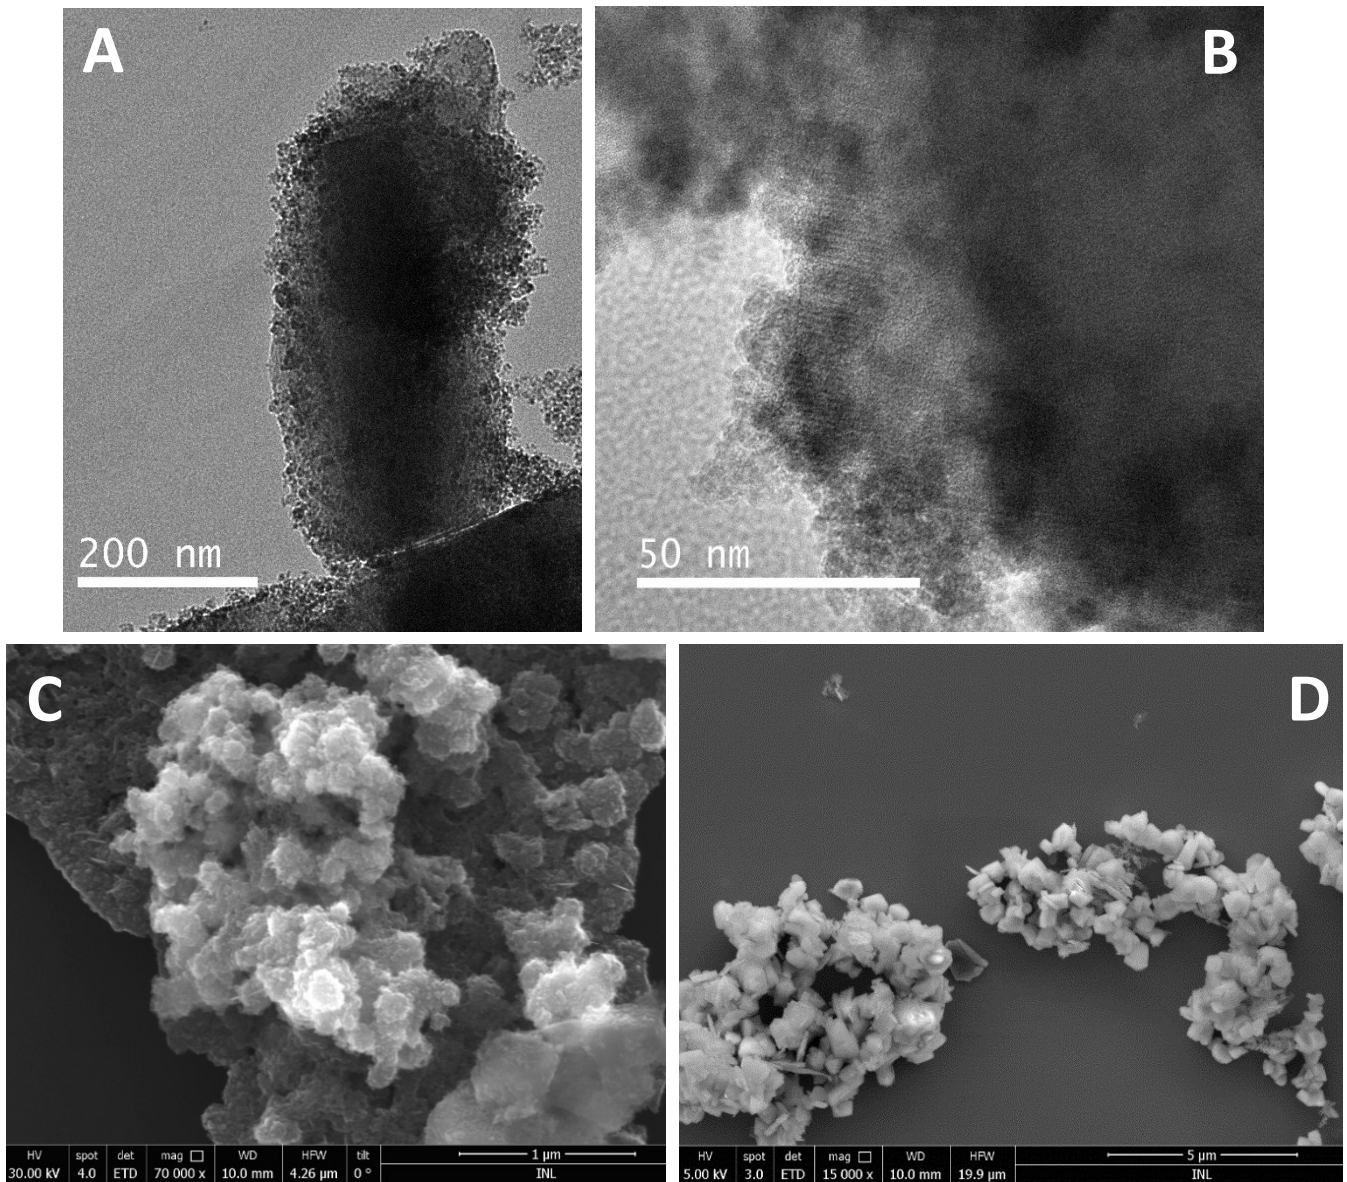

Figure S2: A) TEM image an individual MZNC; B) TEM image of a MZNC crystal in which the porous structure is clearly observed. In both TEM images  $\text{Fe}_3\text{O}_4$  NPs are found to be grafted to the zeolite crystal surface; C) SEM image of MZNC crystals; D) SEM image of parent NaY zeolite crystals.

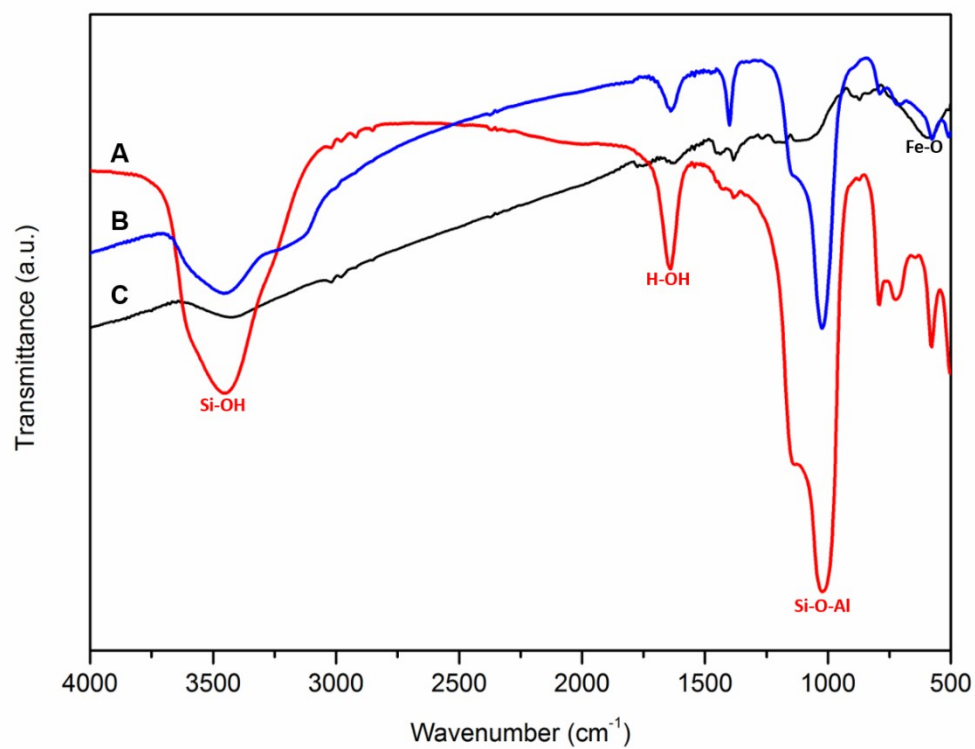

Figure S3: FTIR spectrum of Fe<sub>3</sub>O<sub>4</sub> nanoparticles (black), parent NaY zeolite (blue) and MZNC (red). The IR-active chemical groups attributed to the main bands are indicated.

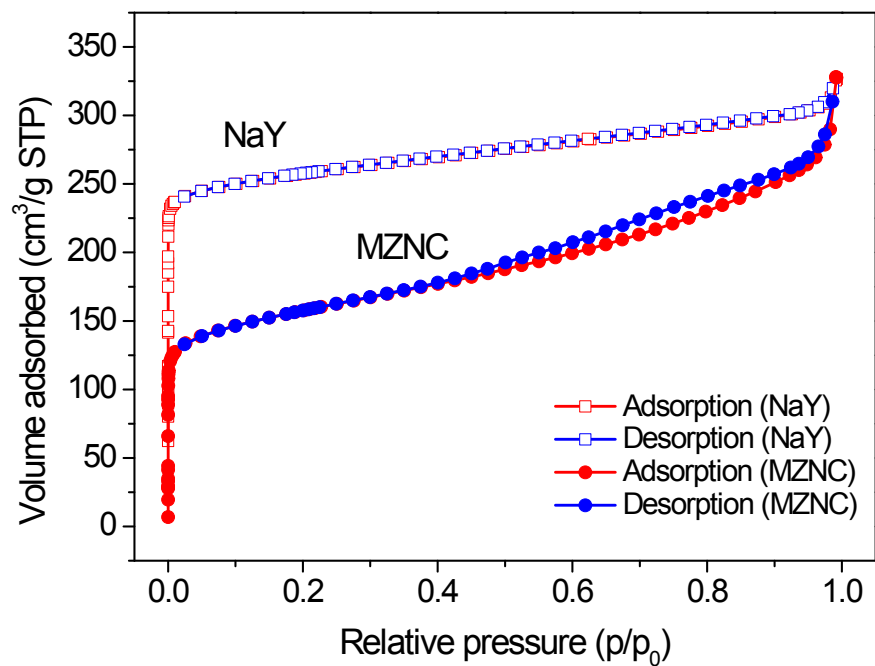

Figure S4: N<sub>2</sub> adsorption-desorption isotherms of parent NaY zeolite (open symbols) and MZNC (closed symbols) particles.

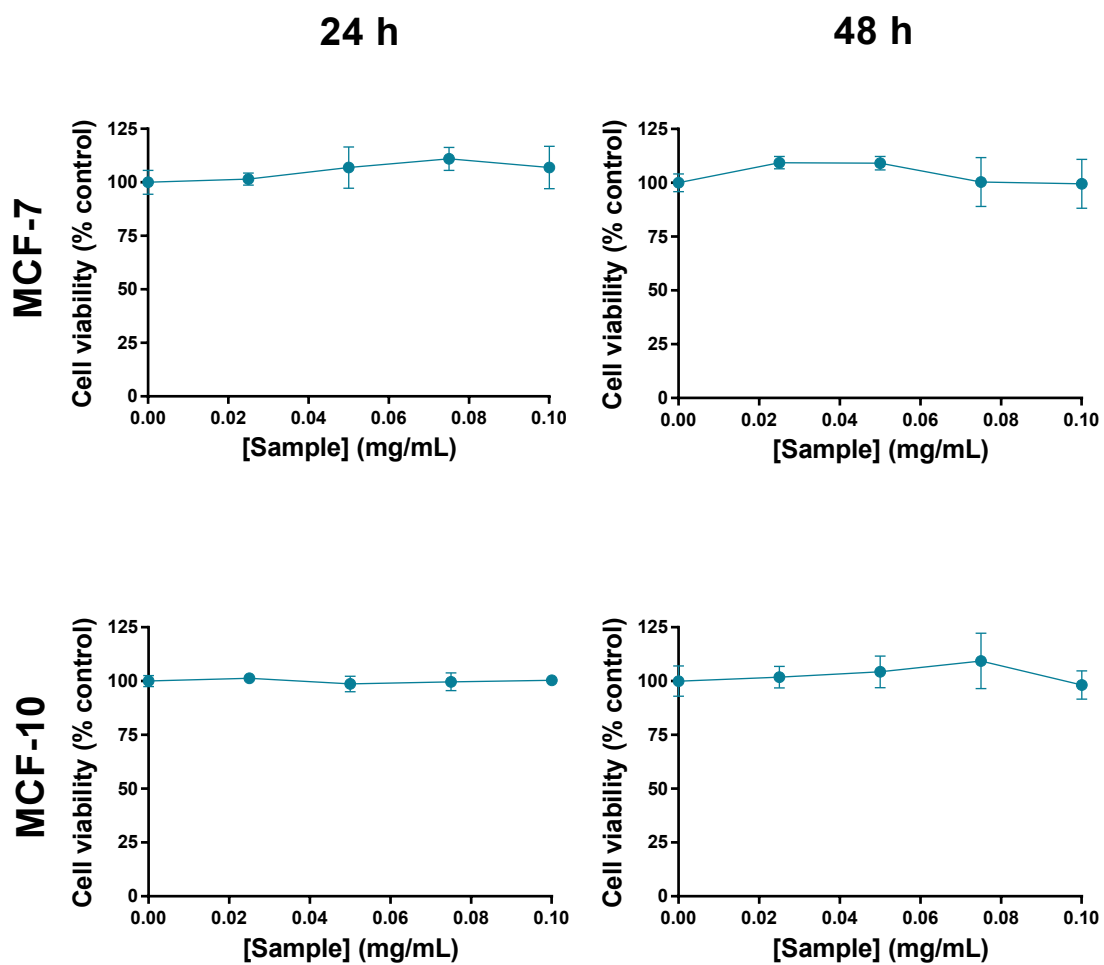

Figure S5: MCF-7 and MCF-10 cell viability after incubation with control magnetite (Fe<sub>3</sub>O<sub>4</sub>) nanoparticles at 24 and 48 h of incubation. The data are given as mean  $\pm$  SD (n=3).
